# Supplementary material for: Demonstrating Analytical Similarity of Trastuzumab Biosimilar HLX02 to Herceptin® with a Panel of Sensitive and Orthogonal Methods Including a Novel FcγRIIIa Affinity Chromatography Technology
Source: PubMed Central journal article supplement — BioDrugs. 2020 Feb 18;34(3):363–79. doi: 10.1007/s40259-020-00407-0 (PMC7211197; doi:10.1007/s40259-020-00407-0), 2020-02-18
Supplement: 40259_2020_407_MOESM1_ESM.pdf [file 40259_2020_407_MOESM1_ESM.pdf]

**Demonstrating Analytical Similarity of Trastuzumab  
Biosimilar HLX02 to Herceptin<sup>®</sup> with a Panel of Sensitive  
and Orthogonal Methods Including a Novel FcγRIIIa  
Affinity Chromatography Technology**

**Running Header: HLX02 is highly similar to Herceptin<sup>®</sup> and particularly more similar to the batches with high FcγRIIIa affinity**

Liqi Xie<sup>#</sup>, Erhui Zhang<sup>#</sup>, Yanpeng Xu, Wenyuan Gao, Linlin Wang, Michael Hongwei Xie<sup>\*</sup>, Peilan Qin, Lihong Lu, Sipeng Li, Pengcheng Shen, Weidong Jiang, Scott Liu

Shanghai Engineering Research Center of Anti-tumor Biologic Drugs, Shanghai Henlius Biotech, Inc. Shanghai, China

<sup>#</sup> Equally contributed;

<sup>\*</sup>To whom correspondence should be addressed, Email: michael\_xie@henlius.com; Tel: 0086-177-21200208

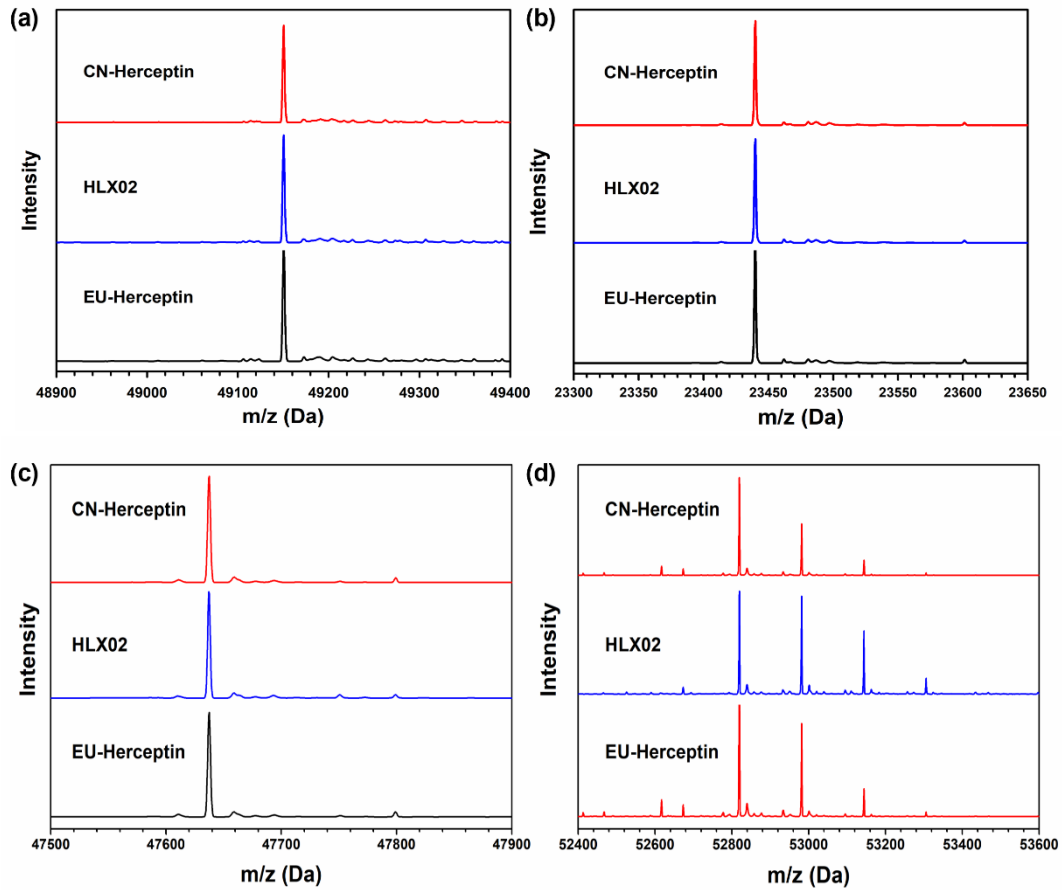

**Supplemental Figure 1.** MS spectra for (a) reduced and deglycosylated HC, (b) reduced LC, (c) Fab and (d) Fc of representative HLX02, CN-Herceptin® and EU-Herceptin®.

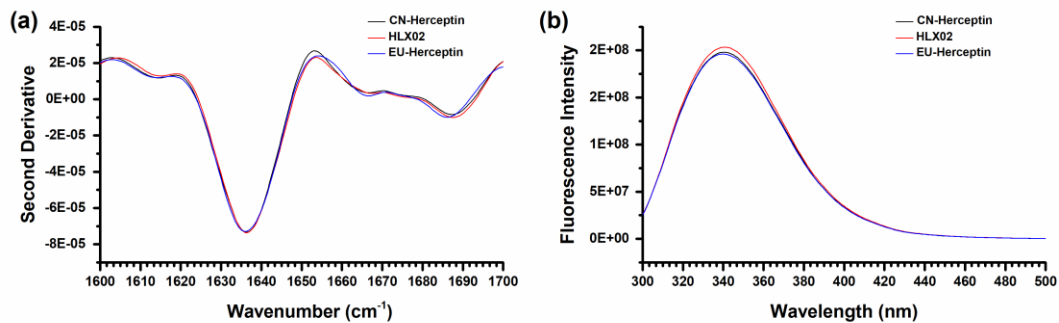

**Supplemental Figure 2.** Higher-order structure of representative HLX02, CN-Herceptin® and EU-Herceptin®. (a) FTIR spectra, (b) FLR spectra.

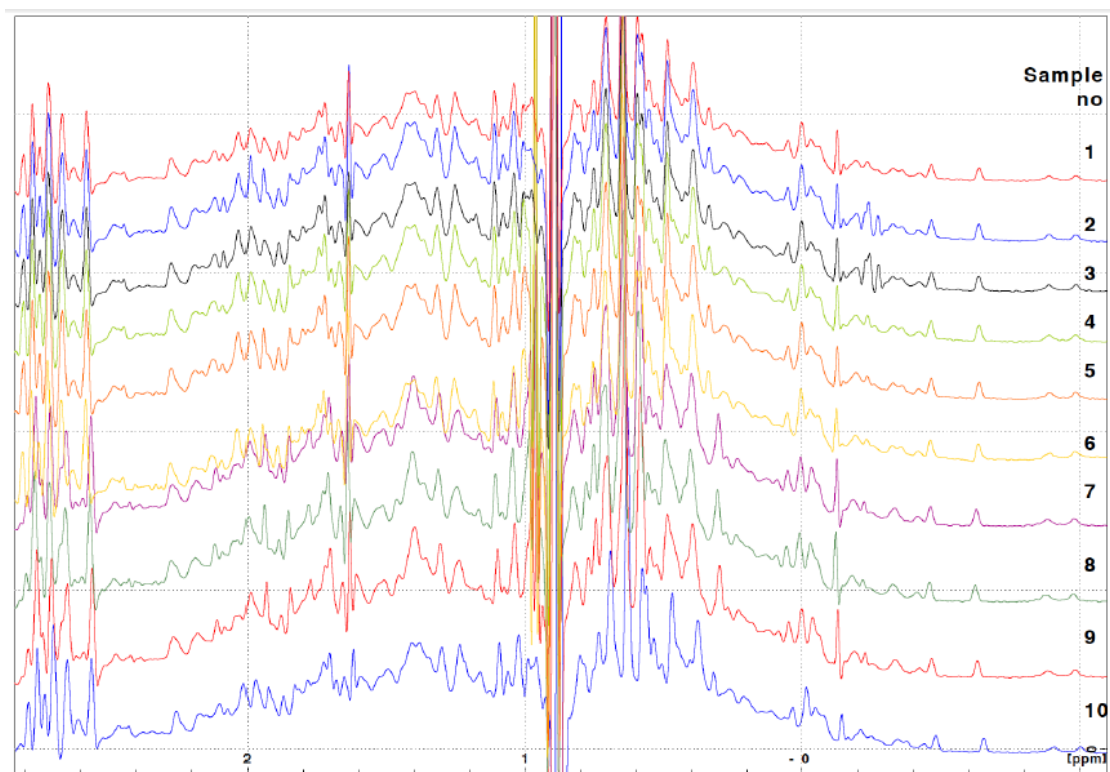

**Supplemental Figure 3.** Expansion of the methyl regions from 1D proton ( $^1\text{H}$ ) NMR spectra of representative HLX02, CN-Herceptin<sup>®</sup> and EU-Herceptin<sup>®</sup> at 303 K. All Spectra display highly similar peak patterns in terms of chemical shift position, line-widths and relative intensities.

Sample 1: HLX02 Batch No. H20180803

Sample 2: HLX02 Batch No. H20180804

Sample 3: HLX02 Batch No. H20180805

Sample 4: EU-Herceptin Batch No. H4544H03

Sample 5: EU-Herceptin Batch No. H4595H01

Sample 6: EU-Herceptin Batch No. H4594H07

Sample 7: CN-Herceptin Batch No. N3772

Sample 8: CN-Herceptin Batch No. N3760

Sample 9: CN-Herceptin Batch No. N3768

Sample 10: Reference Standard, Batch No. H20160804-RM03

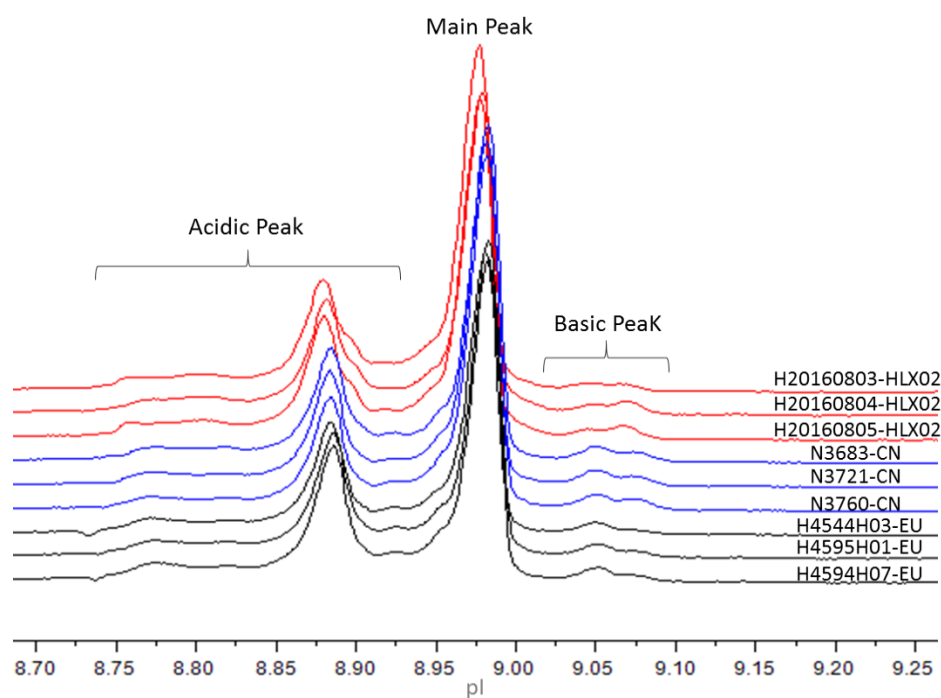

**Supplemental Figure 4.** Overlaid icIEF profiles of representative HLX02, CN-Herceptin® and EU-Herceptin®.

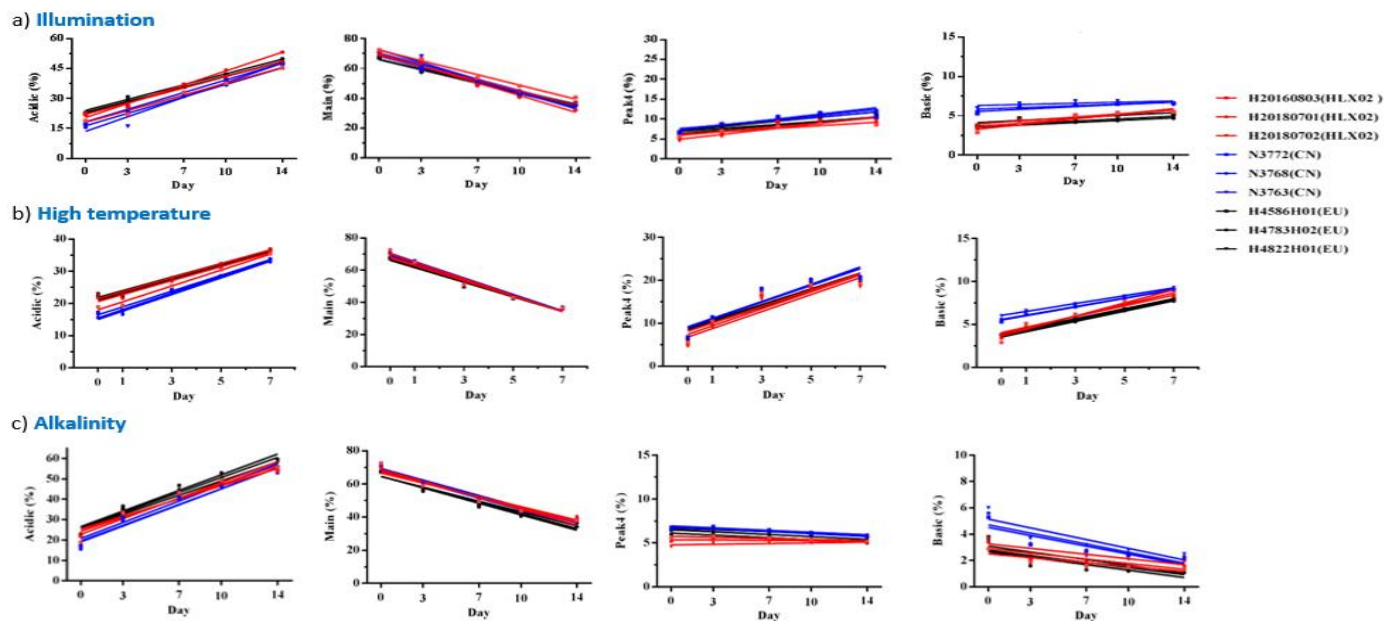

**Supplemental Figure 5.** Comparison of the CEX forced degradation trends under (a) illumination, (b) higher temperature, and (c) alkalinity for HLX02, CN-Herceptin® and EU-Herceptin®.

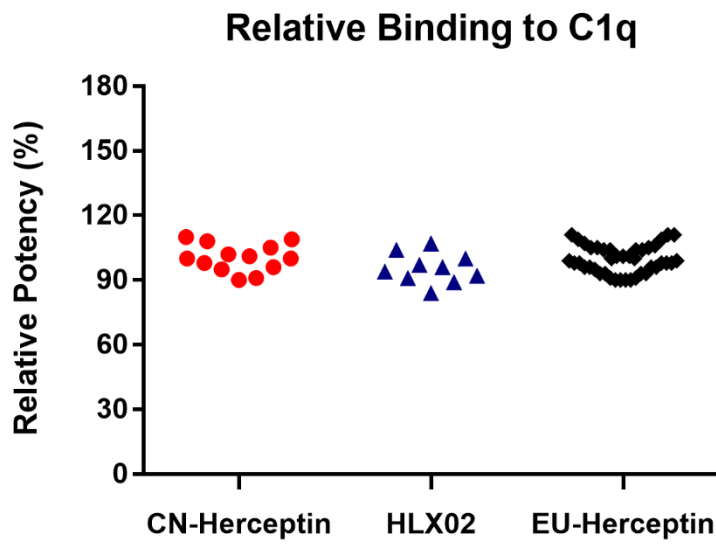

**Supplemental Figure 6.** C1q binding similarity assessment results of HLX02, CN-Herceptin® and EU-Herceptin®.

**Supplemental Table 1** The lot number and expiration date of the reference product and HLX02.

| Source        | Lot code      | Expire date |
|---------------|---------------|-------------|
| CN-Herceptin® | N3683         | 2017.08.24  |
|               | N3687         | 2017.09.18  |
|               | N3698         | 2017.11.06  |
|               | N3703         | 2017.12.06  |
|               | N3714         | 2018.01.23  |
|               | N3721         | 2018.03.02  |
|               | N3735         | 2018.04.07  |
|               | N3739         | 2018.06.03  |
|               | N3760         | 2018.09.04  |
|               | N3763         | 2018.09.08  |
|               | N3768         | 2018.11.19  |
|               | N3772         | 2018.12.13  |
|               | N7074B04      | 2018.06     |
|               | EU-Herceptin® | H4544H03    |
| H4586H01      |               | 2019.05     |
| H4594H07      |               | 2019.06     |
| H4595H01      |               | 2019.06     |
| H4597H04      |               | 2019.04.30  |
| H4611H04      |               | 2019.07     |
| H4618H05      |               | 2019.08     |
| H4619H07      |               | 2019.04.30  |
| H4620H05      |               | 2019.08     |
| H4634H01      |               | 2019.09     |
| H4638H02      |               | 2019.04.30  |
| H4643H01      |               | 2019.04.30  |
| H4723H02      |               | 2020.05.31  |
| H4741H02      |               | 2018.02.16  |
| H4756H04      |               | 2018.02.16  |
| H4783H02      |               | 2020.1      |
| N6001H03      |               | 2020.08     |
| H4804H01      |               | 2020.11     |
| H4822H01      |               | 2021.02     |
| H4823H01      |               | 2021.02     |
| N2002H02      |               | 2021.01     |
| N3006H03      |               | 2021.02     |
| N3007H01      |               | 2021.03     |
| N6001H06      |               | 2020.08     |
| N7185H01      |               | 2020.11     |
| N7195H03      |               | 2020.12     |

|       |           |            |
|-------|-----------|------------|
| HLX02 | H20160805 | 2020.08.29 |
|       | H20160101 | 2020.01.26 |
|       | H20160402 | 2020.03.31 |
|       | H20170101 | 2021.01.18 |
|       | H20170402 | 2021.04.27 |
|       | H20180701 | 2022.07.16 |
|       | H20180702 | 2022.07.29 |
|       | H20180803 | 2022.08.03 |
|       | H20180804 | 2022.08.14 |
|       | H20180805 | 2022.08.20 |

**Supplemental Table 2** Temperature, sampling time points and inspection items for the forced degradation studies.

| Forced degradation            | Temperature | Time points          | Methods                                                                  |
|-------------------------------|-------------|----------------------|--------------------------------------------------------------------------|
| Higher temperature            | 50±2 °C     | Day 0, 1, 3, 5, 7    | SEC-HPLC, CEX-HPLC , NR<br>CE-SDS , Binding, Peptide<br>mapping by LC-MS |
| Light exposure (4500±500 lux) | 25±2 °C     | Day 0, 3, 7, 10, 14  |                                                                          |
| Control (dark)                |             | Day 0, 3, 7, 10, 14  |                                                                          |
| Strong acid (pH 4)            |             | Day 0, 3, 7, 10, 14  |                                                                          |
| Strong base (pH 10)           |             | Day 0, 3, 7, 10, 14  |                                                                          |
| Continuous shaking (1000 rpm) |             | Day 0, 3, 7, 10, 14  |                                                                          |
| Strong oxidizer (1.0% tBHP)   | 2-8 °C      | Hour 0, 3, 8, 24, 32 | SEC-HPLC, CEX-HPLC , NR<br>CE-SDS , Binding, Peptide<br>mapping by LC-MS |

**Supplemental Table 3** The percentage of post translational modifications (PTMs) in HLX02, CN-Herceptin® and EU-Herceptin®

| Sites of PTMs                | Percentage of PTMs (%) |               |               |
|------------------------------|------------------------|---------------|---------------|
|                              | HLX02                  | CN-Herceptin® | EU-Herceptin® |
| Deamidation N (LC:N30)       | 6.37±0.58              | 5.30±0.46     | 6.43±0.29     |
| PyroE HC N-term (HC: E1)     | 0.53 ±0.06             | 0.87 ±0.06    | 0.90 ±0.10    |
| Deamidation N (HC:N55)       | 1.47 ±0.12             | 1.50 ±0.00    | 1.50 ±0.00    |
| Isomer D (HC:D102)           | 3.73 ±0.35             | 3.30 ±0.26    | 2.93 ±0.15    |
| Oxidation M (HC:M255)        | 0.87 ±0.06             | 2.40 ±3.12    | 0.80±0.00     |
| Deamidation N (HC:N318)      | 2.37 ±0.06             | 2.33 ±0.06    | 2.30 ±0.00    |
| Deamidation N (HC:N387/392)  | 1.80 ±0.10             | 1.90 ±0.00    | 1.87 ±0.06    |
| -Lysine HC:C-Term (HC: K450) | 98.40 ±0.44            | 99.47 ±0.06   | 99.63 ±0.06   |

**Supplemental Table 4** Peptides containing disulfide bonds identified in HLX02, CN-Herceptin® and EU-Herceptin®.

| Peptide Sequence*                                                                  | Serial number of peptides | Theory molecular weight (Da) | HLX02                          |                  | CN-Herceptin®                  |                  | EU-Herceptin®                  |                  |                                |                  |                                |                  |           |      |           |      |
|------------------------------------------------------------------------------------|---------------------------|------------------------------|--------------------------------|------------------|--------------------------------|------------------|--------------------------------|------------------|--------------------------------|------------------|--------------------------------|------------------|-----------|------|-----------|------|
|                                                                                    |                           |                              | H20160803                      | H20160804        | H20160805                      | N3683            | N3721                          | N3760            | H4544H03                       | H4595H01         | H4594H07                       |                  |           |      |           |      |
|                                                                                    |                           |                              | Measured molecular weight (Da) | Mass error (ppm) | Measured molecular weight (Da) | Mass error (ppm) | Measured molecular weight (Da) | Mass error (ppm) | Measured molecular weight (Da) | Mass error (ppm) | Measured molecular weight (Da) | Mass error (ppm) |           |      |           |      |
| VITICR=SGIDFILTISII                                                                |                           | 4819.2422                    | 4819.2407                      | -0.3             | 4819.2456                      | 0.7              | 4819.2305                      | -2.4             | 4819.2363                      | -1.2             | 4819.2407                      | -0.3             | 4819.2388 | -0.7 | 4819.2329 | -1.9 |
| QPEDFATYYCQQHYITPP<br>IFGQGTK                                                      | LC:T02-LC:T08             |                              |                                |                  |                                |                  |                                |                  |                                |                  |                                |                  |           |      |           |      |
| SGTASVGLNINYPK=V<br>YACEVTHQGLSSPVTK                                               | LC:T12-LC:T19             | 3555.749                     | 3555.7456                      | -1               | 3555.7502                      | 0.3              | 3555.7446                      | -1.2             | 3555.7566                      | 2.1              | 3555.7483                      | -0.2             | 3555.7598 | 3    | 3555.7542 | 1.5  |
| GEC=SCDK                                                                           | LC:T21-HC:T20             | 756.2418                     | 756.2455                       | 4.9              | 756.2424                       | 0.8              | 756.243                        | 1.6              | 756.2451                       | 4.4              | 756.244                        | 2.9              | 756.2451  | 4.4  | 756.2451  | 4.4  |
| LSCAASGFNIK=AEDTAV<br>YICSR                                                        | HC:T02-HC:T11             | 2384.0776                    | 2384.0793                      | 0.7              | 2384.085                       | 3.1              | 2384.0825                      | 2.1              | 2384.0864                      | 3.7              | 2384.085                       | 3.1              | 2384.0818 | 1.8  | 2384.0818 | 1.8  |
| STSGGTAALGCLVK=DYF<br>PEPTVSWNSGALTSVGH<br>TFPVALQSSGLYLSLVVT<br>VFSLSLGTQIYCNVNHK | HC:T14-HC:T15             | 7389.6489                    | 7389.6304                      | -2.5             | 7389.6313                      | -2.4             | 7389.6177                      | -4.2             | 7389.6309                      | -2.4             | 7389.6118                      | -5               | 7389.6382 | -1.4 | 7389.6357 | -1.8 |
| THTCPAPPELLGGPSVF<br>LFPFK=THTCPAPPELL<br>GGPSVFLFPK**                             | HC:T21-HC:T21             | 5004.4878                    | 5004.4814                      | -1.3             | 5004.48                        | -1.6             | 5004.48                        | -1.6             | 5004.4883                      | 0.1              | 5004.4614                      | -5.3             | 5004.4917 | 0.8  | 5004.4858 | -0.4 |
| IPETVCVVVDSHEDPEV<br>K=CK                                                          | HC:T24-HC:T31             | 2328.0977                    | 2328.1028                      | 2.2              | 2328.1038                      | 2.6              | 2328.103                       | 2.3              | 2328.1045                      | 2.9              | 2328.1011                      | 1.5              | 2328.1016 | 1.7  | 2328.1047 | 3    |
| NOVSLTCLVK=WQQGNV<br>FSCSVMEALHNHYTQK                                              | HC:T39-HC:T44             | 3844.8235                    | 3844.8257                      | 0.6              | 3844.8135                      | -2.6             | 3844.8274                      | 1                | 3844.8362                      | 3.3              | 3844.8254                      | 0.5              | 3844.8281 | 1.2  | 3844.8289 | 1.4  |

\* "-" represent disulfide bonds

\*\* HC-HC interchain disulfide bonds



**Supplemental Table 5** CEX similarity assessment results of HLX02, CN-Herceptin® and EU-Herceptin®.

| Sample              | Acid variants % mean<br>(range) | Main peak % mean<br>(range) | Basic variants % mean<br>(range) | Peak 4 % mean<br>(range) |
|---------------------|---------------------------------|-----------------------------|----------------------------------|--------------------------|
| CN-Herceptin®       | 17.1<br>(15.6-18.8)             | 71.0<br>(69.6-72.5)         | 5.2<br>(4.4-6.1)                 | 6.7<br>(6.3-6.9)         |
| EU-Herceptin®       | 21.4<br>(17.9-23.3)             | 68.2<br>(66.3-70.5)         | 4.0<br>(3.4-5.4)                 | 6.4<br>(3.4-5.4)         |
| HLX02               | 22.3<br>(18.7-24.9)             | 68.2<br>(64.2-73.6)         | 4.1<br>(2.9-5.4)                 | 5.4<br>(4.4-6.3)         |
| Similarity interval | 12.5-27.5                       | 63.7-74.5                   | 2.0-6.8                          | 5.9-7.1                  |

**Supplemental Table 6** The percentage of molecular weight variants identified by SEC-UV/MALS analysis.

| Sample              | Aggregate % mean<br>(range) | Aggregate Molecular weight (KD) | Monomer % mean<br>(range) | Monomer Molecular weight (KD) |
|---------------------|-----------------------------|---------------------------------|---------------------------|-------------------------------|
| CN-Herceptin®       | 0.5<br>(0.3-0.6)            | 287.5-299.6                     | 99.5<br>(99.4-99.6)       | 144.8-145.0                   |
| EU-Herceptin®       | 0.5<br>(0.4-0.5)            | 282.9-285.7                     | 99.5<br>(99.4-99.6)       | 144.8-145.1                   |
| HLX02               | 0.3<br>(0.2-0.4)            | 279.6-308.6                     | 99.7<br>(99.5-99.7)       | 144.7                         |
| Similarity interval | 0.2-0.8                     | Visual Similar                  | 99.2-99.8                 | Visual Similar                |

**Supplemental Table 7** Percentage of Monomer, Dimer and Higher Oligomers based on Absorbance Data of AUC Measurements

| Sample        | Monomer % | Dimer%  | c>dim % |
|---------------|-----------|---------|---------|
| HLX02         | 97.3-98.5 | 0.4-1.2 | 1.1-1.5 |
| EU-Herceptin® | 97.9-98.5 | 0.8-1.2 | 0.7-1.1 |
| CN-Herceptin® | 97.7-98.4 | 0.8-1.2 | 0.8-1.2 |

**Supplemental Table 8** The purity level identified by nonreduced and reduced CE-SDS.

| Sample              | Nonreduced                   | Reduced                                |                              |
|---------------------|------------------------------|----------------------------------------|------------------------------|
|                     | Monomer %<br>mean<br>(range) | Unglycosylated<br>HC % mean<br>(range) | (HC+LC) %<br>mean<br>(range) |
| CN-Herceptin®       | 97.0<br>(96.5-97.6)          | 0.8<br>(0.7-0.9)                       | 98.5<br>(98.1-98.7)          |
| EU-Herceptin®       | 96.9<br>(96.2-97.5)          | 0.7<br>(0.6-0.8)                       | 98.7<br>(98.5-98.9)          |
| HLX02               | 96.9<br>(96.5-97.1)          | 0.3<br>(0.3-0.4)                       | 99.0<br>(98.7-99.2)          |
| Similarity interval | 96.0-97.8                    | 0.4-1.0                                | 98.1-99.3                    |

**Supplemental Table 9** Particle analysis results of HLX02, CN-Herceptin® and EU-Herceptin®.

| Method<br>Sample | MFI Particles (Counts/mL)      |                                | DLS     |
|------------------|--------------------------------|--------------------------------|---------|
|                  | ECD $\geq$ 10<br>$\mu\text{m}$ | ECD $\geq$ 25<br>$\mu\text{m}$ | d.nm    |
| HLX02            | 20-186                         | 0-37                           | 3.6-3.7 |
| EU-Herceptin®    | 88-112                         | 9-14                           | 3.7-3.8 |
| CN-Herceptin®    | 100-658                        | 7-25                           | 3.6-3.7 |

**Supplemental Table 10** The concentration of bioprocess residuals in HLX02, CN-Herceptin® and EU-Herceptin®.

| Sample | Lot code  | DNA<br>(pg/mg) | HCP<br>(ppm) | Protein A<br>(ppm) |
|--------|-----------|----------------|--------------|--------------------|
| HLX02  | H20160803 | <0.05          | <2           | <0.5               |
|        | H20160804 | <0.05          | <2           | <0.5               |
|        | H20160805 | <0.05          | <2           | <0.5               |
|        | H20170101 | <0.05          | <2           | <0.5               |
|        | H20170402 | <0.05          | <2           | <0.5               |
|        | H20180701 | <0.05          | <2           | <0.5               |
|        | H20180702 | <0.05          | <2           | <0.5               |
|        | H20180803 | <0.05          | <2           | <0.5               |
|        | H20180804 | <0.04          | <2           | <0.5               |

|               |               |          |       |      |
|---------------|---------------|----------|-------|------|
|               | H20180805     | <0.05    | <2    | <0.5 |
| CN-Herceptin® | N3683         | <0.04    | <2    | <0.5 |
|               | N3687         | <0.04    | <2    | <0.5 |
|               | N3698         | <0.04    | <2    | <0.5 |
|               | N3703         | <0.04    | <2    | <0.5 |
|               | N3714         | <0.04    | <2    | <0.5 |
|               | N3721         | <0.04    | <2    | 1    |
|               | N3735         | <0.04    | <2    | <0.5 |
|               | N3739         | <0.04    | <2    | <0.5 |
|               | N3760         | <0.04    | <2    | <0.5 |
|               | N3763         | <0.04    | <2    | <0.5 |
|               | N3768         | <0.04    | <2    | <0.5 |
|               | N3772         | <0.04    | <2    | <0.5 |
|               | N7074B04      | <0.04    | <2    | <0.5 |
|               | EU-Herceptin® | H4544H03 | <0.04 | <2   |
| H4595H01      |               | <0.04    | <2    | <0.5 |
| H4586H01      |               | <0.04    | <2    | <0.5 |
| H4594H07      |               | <0.04    | <2    | <0.5 |
| H4620H05      |               | <0.04    | <2    | <0.5 |
| H4618H05      |               | <0.05    | <2    | <0.5 |
| H4634H01      |               | <0.04    | <2    | <0.5 |
| H4611H04      |               | <0.04    | <2    | <0.5 |
| H4597H04      |               | <0.04    | <2    | <0.5 |
| H4643H01      |               | <0.04    | <2    | <0.5 |
| H4619H07      |               | <0.04    | <2    | <0.5 |
| H4638H02      |               | <0.04    | <2    | <0.5 |
| H4723H02      |               | <0.04    | <2    | <0.5 |
| H4756H04      |               | <0.04    | <2    | <0.5 |
| H4741H02      |               | <0.04    | <2    | <0.5 |
| H4783H02      |               | <0.04    | <2    | <0.5 |
| H4804H01      |               | <0.04    | <2    | <0.5 |
| N6001H06      |               | <0.04    | <2    | <0.5 |
| H4823H01      |               | <0.04    | <2    | <0.5 |
| H4822H01      |               | <0.04    | <2    | <0.5 |
| N2002H02      |               | <0.04    | <2    | <0.5 |
| N3006H03      |               | <0.04    | <2    | <0.5 |
| N7185H01      |               | <0.04    | <2    | <0.5 |
| N6001H03      |               | <0.04    | <2    | <0.5 |
| N7195H03      |               | <0.04    | <2    | <0.5 |
| N3007H01      |               | <0.05    | <2    | <0.5 |

**Supplemental Table 11** %Glycans of HLX02, CN-Herceptin® and EU-Herceptin®.

| Sample                 | G0F% <sup>*</sup><br>mean<br>(range) | Man% <sup>§</sup><br>mean<br>(range) | Sialylation% <sup>†</sup><br>mean (range) | Gal% <sup>‡</sup><br>mean<br>(range) | Afuc% <sup>**</sup><br>mean<br>(range) | NANA<br>mol/mol<br>mean (range) | NGNA<br>mol/mol<br>mean (range) |
|------------------------|--------------------------------------|--------------------------------------|-------------------------------------------|--------------------------------------|----------------------------------------|---------------------------------|---------------------------------|
| HLX02                  | 48.3<br>(41.8-51.4)                  | 2.8<br>(2.3-3.3)                     | 2.8<br>(2.4-3.7)                          | 40.3<br>(37.3-46.6)                  | 5.2<br>(4.2-6.4)                       | 0.105<br>(0.087-0.137)          | ND<br>(ND-0.001)                |
| CN-Herceptin®          | 55.4<br>(40.8-66.5)                  | 3.4<br>(2.3-4.6)                     | 1.2<br>(0.8-1.9)                          | 33.8<br>(23.9-47.8)                  | 6.1<br>(4.8-8.1)                       | 0.043<br>(0.033-0.058)          | 0.003<br>(0.002-0.003)          |
| EU-Herceptin®          | 54.7<br>(41.2-70.1)                  | 1.9<br>(1.4-3.3)                     | 1.2<br>(0.9-1.8)                          | 36.2<br>(21.8-48.9)                  | 6.0<br>(4.6-7.6)                       | 0.046<br>(0.028-0.061)          | 0.004<br>(0.002-0.005)          |
| Similarity<br>interval | 23.7-86.1                            | 0-5.1                                | 0-2.4                                     | 6.3-64.5                             | 2.5-9.7                                | 0.013-0.076                     | 0.001-0.006                     |

\* represent G0F, G0F-GN, G0FB type N-glycans

§ represent Man5, Man6, Man7, Man8, Man9 type N-glycans

† represent G1FS1, G1FS1-GN, G2FS1, G2FS2 type N-glycans

‡ represent G1, G1', G1F, G1F', G1F-GN, G1FB, G2, G2F type N-glycans

\*\* represent G0, G0-GN, G1, G1', G2 type N-glycans
